# Predisposing factors of teenage pregnancy in the Uganda Lake Victoria Island and Mountain districts

Richard Tuyiragize<sup>1,2</sup>, Abel Nzabona<sup>1,2</sup>, John Bosco Asiimwe<sup>1,2</sup>, Christian Kakuba<sup>1,2</sup>, John Mushomi<sup>1,2</sup>  
and Fred Maniragaba<sup>1,2</sup>

<sup>1</sup>School of Statistics and Planning, Makerere University

<sup>2</sup>Centre for Population and Applied Statistics, Makerere University

## Abstract

**Introduction:** There is a high teenage pregnancy in Lake Victoria Island and Mountain districts of Uganda. Teenage pregnancy is highly associated with abortions, infant and maternal mortality, high rate of unemployment, school failure and drop-outs and limited future career opportunities. This paper identifies and explains the factors influencing teenage pregnancy in Uganda Lake Victoria Island shoreline area and mountain districts.

**Methods:** The analysis focused on 405 girls aged 15–19 years, generated from the 2016 Uganda demographic and Health Survey. Odds ratios with 95% confidence interval and p-values were computed using appropriate logistic regression models to determine the presence and strength of associations between the teenage pregnancy and independent variables.

**Results:** Age, residence, secondary or higher education level, female-headed households, marital status (married), occupation, wealth index (rich quintile), and knowledge of ovulation cycle were found to have statistically significant associations with teenage pregnancy.

**Conclusion:** Increased age, rural residence, occupation (not working), and knowledge of ovulation cycle were statistically significant predisposing factors of teenage pregnancy in Uganda Lake Victoria Island shoreline area and mountain districts. Teenagers in these study areas should be provided with sexual education as well as teenage-friendly health services at health facilities that include a wide range of options, as well as medically accurate counselling and information could mitigate teenage pregnancy.

## Keywords:

Teenage pregnancy, predisposing factors, Uganda

## Introduction

Teenage pregnancy and childbirth to women less than 20 years old continues to be a major global public health concern, affecting more than 16 million girls and young women worldwide (WHO, 2014). Teenage pregnancy is highly associated with abortions, infant and maternal mortality, high rate of unemployment, school failure and drop-outs and limited future career opportunities. As a result of increased awareness of the socioeconomic consequences of teenage pregnancy, researchers and policy makers have concluded that teenage pregnancy and childbearing is a serious problem (Gebregzabher,

39 Hailu, & Assefa, 2018; Lillian & Mumbango, 2015; Gyan, 2013; Yakubu & Salisu, 2018; Ayanaw  
40 Habitu, Yalew, & Azale Bisetegn, 2018; Omoro et al., 2017).

41 According to the findings of the Uganda Demographic and Health Survey (UDHS) (UBOS, 2016),  
42 one out four (25%) girls aged 15 – 19 years have either a child or are pregnant, representing a 1%  
43 increase in teenage pregnancy rates over the previous 2011 survey,(UBOS, 2011). The highest  
44 prevalence of teenage pregnancy is in Lake Victoria Island districts at 48%,(UBOS, 2016). This shows  
45 that teenage pregnancy remains a major issue in the Lake Victoria Island districts. The low use of  
46 contraception has been associated with high fertility, which remains a public health concern that  
47 should be averted.

48 According to UDHS (2011) approximately 35% of girls drop out of school because of early marriage  
49 and 23% do so because of early pregnancy. Early childbearing carries particular risks, including  
50 dropping out of school, abandoning babies and obtaining illegal abortion that may result into death.  
51 Lillian & Mumbango (2015) revealed that teenage pregnancy and childbearing is a serious social  
52 problem that is linked to the spread of HIV/ AIDS, sexual abuse, neglect, and abortions as well as  
53 infant and maternal mortality. Their results showed that teenage pregnancy was influenced by  
54 generation, region, highest educational level, socio-economic status and cultural factors. Kabagenyi,  
55 Habaasa & Rutaremwa (2016) conducted a study to examine what influences teenager's use of  
56 contraception among teenagers in Uganda. Their findings show that the key predictors were age at  
57 first birth, history of previous birth, current age, place of residence, education and socioeconomic  
58 status. The conclusion was great need to address barriers to use of contraception among young people.  
59 Use of contraception and improving access to the services is highly recommended to avert some of  
60 the unplanned births among these females(Babirye, Akulume, Kisakye, & Kiwanuka, 2018; Murphy-  
61 Erby, Stauss, & Estupinian, 2013).

62 According to UDHS(2016), the Eastern and East Central regions showed the highest rates of teenage  
63 pregnancy in Uganda with 30.1% and 31.6% respectively which is higher than the national figure. This  
64 is as a result of unsafe sexual practices. In addition to the unwanted/ early/ teenage pregnancies, these  
65 young people are also at a high risk of HIV infection and infection from other STIs (Lwihula,  
66 Outwater, & Nyamuryekung'e, 2006). There is need for an integrated approach to curb teenage  
67 pregnancy. Atuyambe et al (2008) concluded that pregnant teenagers in Wakiso district (Including  
68 Lake Victoria shoreline areas) lack basic needs like shelter, food and security. They also face relational  
69 problems with families, partners and the community. Several social factors such as religious beliefs,  
70 idleness and economic factors have been identified as factors contributing to early pregnancy and  
71 marriage (Gideon, 2013; Amoran, 2012; Donoghue, 1992; UNICEF, 2015; Jewkes, Vundule, Maforah,  
72 & Jordaan, 2001; Kaye, 2008; Mollborn, 2010) .

73 There is, therefore, a need to sensitize the community and school personnel about adolescent  
74 reproductive health issues. In addition, adolescent friendly services need to be established or  
75 strengthened. Continuous in-service training for health workers with emphasis on counseling skills  
76 for young people is urgently needed. This paper identifies and explains the factors influencing teenage  
77 pregnancy in Uganda Lake Victoria Island shoreline area and mountain districts.

78  
79 **Materials and Methods**

80 The paper uses secondary data extracted from the 2016 Uganda Demographic and Health Survey  
81 (UDHS) dataset. The 2016 UDHS special areas include the Islands and shoreline districts (Kalangala,  
82 Mayuge, Buvuma, Namayingo, Rakai, Mukono and Wakiso) and mountains districts (Bundibugyo,  
83 Kasese, Ntoroko, Bukwo, Bulambuli, Kapchorwa, Kween, Kisoro, Sironko, Mbale, and Kaabong).

84  
85 The UDHS used a multistage cluster sampling, whereby at first stage, a random sample of enumeration  
86 areas (EA), which are primary sampling units, was chosen from the census sampling frame. From the  
87 selected EAs, households were systematically drawn. Only women of reproductive age (15–49 years),  
88 in the selected households, were interviewed using a face-to-face questionnaire.

89 The questionnaire included variables on individual bio demographic factors, household characteristics,  
90 and sexual history. In our study, the main variable of interest was age at first birth or pregnancy of a  
91 woman. If yes, it was coded 1 and 0 otherwise, for women in the reproductive age-group. The  
92 explanatory variables included current age, education level, residence, household head (male or  
93 female), relationship to household head, marital status, religion, occupation/employment, social  
94 economic status (wealth index), knowledge of any contraception method, and knowledge of fertile  
95 period.

96 Data analysis was conducted at three stages to explore the predisposing factors of teenage pregnancy  
97 in Uganda Lake Victoria Island shoreline area and mountain districts. There was generation of  
98 descriptive statistics of demographic and socio-economic variables. Some independent variables were  
99 cross tabulated with teenage pregnancy to establish any potential associations. At the multivariate stage  
100 binary logistic regression was used, and both unadjusted and adjusted logistic regression findings  
101 presented. All the data were weighted to account for clustering and design effect. STATA 15 was used  
102 for the analyses.

## 103 **Results**

### 104 **Characteristics of respondents**

105 Majority of the teenagers were below 18 years (66.0%) and about 14.7% had their first birth at less  
106 than 15 years (Table 1). The percentage of teenagers with primary or no education (69.2%) more than  
107 doubled those with secondary or higher education. This implies that educating teenagers may have a  
108 significant effect in mitigating against teenage pregnancy. Majority of the teenagers (77.1%) were living  
109 in the rural areas, with their parents (47.5%), while one in three (33.4%) teenagers came from female-  
110 headed households, and were never married (77.2%).

111  
112 There were only 20.2% of the teenagers in the richest wealth quintile. Asked about their religious  
113 affiliation, 34.9% of the teenagers were Catholics, while 33.5% were Anglicans and the majorities were  
114 not using contraception (87.9%). Whereas 97.0% of the teenagers had knowledge of family planning  
115 methods, 60.3% did not know the fertile period (ovulation cycle).

116

117 **Table 1: Characteristics of respondents**

| <b>Background characteristics</b>             | <b>Number</b> | <b>Percentage</b> |
|-----------------------------------------------|---------------|-------------------|
| <b>Age in years</b>                           |               |                   |
| 15                                            | 86            | 21.0              |
| 16                                            | 92            | 22.8              |
| 17                                            | 90            | 22.2              |
| 18                                            | 82            | 20.4              |
| 19                                            | 55            | 13.6              |
| <b>Age at first birth</b>                     |               |                   |
| Less than 15 years                            | 13            | 14.7              |
| 15 – 19 years                                 | 75            | 85.3              |
| <b>Special areas</b>                          |               |                   |
| Lake Victoria Island shoreline area districts | 38            | 9.3               |
| Mountain districts                            | 367           | 90.7              |
| <b>Residence</b>                              |               |                   |
| Urban                                         | 93            | 22.9              |
| Rural                                         | 312           | 77.1              |
| <b>Education level</b>                        |               |                   |
| None                                          | 16            | 4.0               |
| Primary                                       | 264           | 65.2              |
| Secondary +                                   | 124           | 30.8              |
| <b>Sex of household head</b>                  |               |                   |
| Male                                          | 269           | 66.6              |
| Female                                        | 135           | 33.4              |
| <b>Marital status</b>                         |               |                   |
| Never married                                 | 312           | 77.2              |
| Married                                       | 81            | 20.0              |
| Ever married                                  | 12            | 2.8               |
| <b>Religion</b>                               |               |                   |
| Anglican                                      | 136           | 33.5              |
| Catholic                                      | 141           | 34.9              |
| Moslem                                        | 56            | 13.8              |
| Other                                         | 72            | 17.8              |
| <b>Occupation</b>                             |               |                   |
| Working                                       | 196           | 48.5              |
| Not working                                   | 208           | 51.5              |
| <b>Wealth index</b>                           |               |                   |
| Poorest                                       | 42            | 10.5              |
| Poorer                                        | 90            | 22.1              |
| Middle                                        | 108           | 26.7              |
| Richer                                        | 83            | 20.4              |
| Richest                                       | 82            | 20.2              |
| <b>Knowledge of any FP method</b>             |               |                   |
| Knows FP methods                              | 392           | 97.0              |
| Knows nothing                                 | 12            | 3.0               |

118

119 **Table 1: Continued**

| <b>Knowledge of fertile period (ovulation cycle)</b> |     |      |
|------------------------------------------------------|-----|------|
| During periods                                       | 20  | 4.9  |
| After periods                                        | 160 | 39.7 |
| Middle of periods                                    | 42  | 10.3 |
| Before periods                                       | 43  | 10.6 |
| Any time                                             | 31  | 7.7  |
| Don't know                                           | 109 | 26.8 |

120

121 **Prevalence of teenage pregnancy**

122 Teenage pregnancy in Lake Victoria Island districts was twice (48.7%) that of Mountain districts  
123 (24.3%), as well as twice the national figure of 25%. Table 2 indicates that teenage pregnancy was  
124 higher for teenagers in rural areas than urban ones, and the association was statistically significant  
125 ( $p=0.040$ ).

126

127 The prevalence of teenage pregnancy decreased with increasing education level, and the association  
128 was statistically significant ( $p=0.039$ ). Teenage pregnancy in male headed households (31.7%) was  
129 statistically significantly different ( $p=0.000$ ) from female headed households (16.2%). There was twice  
130 teenage pregnancy rate in male headed households compared to the female headed households.  
131 Teenage pregnancy in married (91.2%) and ever married (84.1%) teens was statistically significantly  
132 different ( $p=0.000$ ) from those who were never married (8.9%).

133

134 Teenage pregnancy is statistically significantly associated with occupation of the teens ( $p=0.001$ ).  
135 There was almost twice teenage pregnancy rate in the not working teens (35.2%) compared to the  
136 working class (18.3%). The results further indicate that teenage pregnancy decreased with increase in  
137 wealth index.

138

139 There were statistically significant associations between knowledge of family planning methods  
140 ( $p=0.000$ ) and teenage pregnancy. In addition, there was a higher teenage pregnancy in teens who had  
141 knowledge of ovulation cycle (36.2%) compared to those who had no knowledge at all (20.2%), and  
142 the difference was statistically significant ( $p=0.005$ ).

143

144 Table 2: Prevalence of teenage pregnancy by background characteristics

| <b>Background characteristics</b>                    | <b>No pregnancy</b> | <b>Pregnancy</b> | <b>Total</b> |
|------------------------------------------------------|---------------------|------------------|--------------|
| <b>Residence</b>                                     |                     |                  |              |
| Urban                                                | 82.3                | 17.7             | 93           |
| Rural                                                | 70.9                | 29.1             | 312          |
|                                                      | $\chi^2 = 6.43$     |                  | p=0.040      |
| <b>Special areas</b>                                 |                     |                  |              |
| Lake Victoria Island shoreline area districts        | 51.7                | 48.3             | 38           |
| Mountain districts                                   | 75.7                | 24.3             | 367          |
|                                                      | $\chi^2 = 13.6$     |                  | p=0.000      |
| <b>Education level</b>                               |                     |                  |              |
| None                                                 | 66.2                | 33.8             | 16           |
| Primary                                              | 69.6                | 30.4             | 264          |
| Secondary +                                          | 82.2                | 17.8             | 125          |
|                                                      | $\chi^2 = 10.4$     |                  | p=0.039      |
| <b>Sex of household head</b>                         |                     |                  |              |
| Male                                                 | 68.3                | 31.7             | 270          |
| Female                                               | 83.8                | 16.2             | 135          |
|                                                      | $\chi^2 = 14.8$     |                  | p=0.000      |
| <b>Marital status</b>                                |                     |                  |              |
| Never married                                        | 91.1                | 8.9              | 312          |
| Married                                              | 8.8                 | 91.2             | 81           |
| Ever married                                         | 15.9                | 84.1             | 12           |
|                                                      | $\chi^2 = 294$      |                  | p=0.000      |
| <b>Occupation</b>                                    |                     |                  |              |
| Working                                              | 81.7                | 18.3             | 208          |
| Not working                                          | 64.8                | 35.2             | 197          |
|                                                      | $\chi^2 = 19.9$     |                  | p=0.001      |
| <b>Wealth Index</b>                                  |                     |                  |              |
| Poor                                                 | 64.3                | 35.7             | 132          |
| Middle                                               | 76.0                | 24.0             | 108          |
| Rich                                                 | 79.2                | 20.8             | 165          |
|                                                      | $\chi^2 = 11.8$     |                  | p=0.016      |
| <b>Knowledge of any FP method</b>                    |                     |                  |              |
| Knows FP methods                                     | 72.6                | 27.4             | 392          |
| Knows nothing                                        | 98.3                | 1.7              | 13           |
|                                                      | $\chi^2 = 5.57$     |                  | p=0.000      |
| <b>Knowledge of fertile period (ovulation cycle)</b> |                     |                  |              |
| Don't know                                           | 79.8                | 20.2             | 244          |
| Know (After periods)                                 | 63.8                | 36.2             | 161          |
|                                                      | $\chi^2 = 17.1$     |                  | p=0.005      |

145

146 Predictors of teenage pregnancy

147 The variables with significant associations with teenage pregnancy were included in the binary  
 148 logistic regression model, and the results are presented in Table 3.

149

150 Table 3: Predictors of teenage pregnancy

| Background Characteristics                                 | Odds Ratio | 95% Confidence Interval |
|------------------------------------------------------------|------------|-------------------------|
| <b>Teenager's age</b>                                      |            |                         |
| Current age                                                | 2.00**     | 1.65 – 2.43             |
| <b>Special areas</b>                                       |            |                         |
| Lake Victoria Island shoreline area districts <sup>R</sup> | 1.00       |                         |
| Mountain districts                                         | 0.34**     | 0.20 – 0.59             |
| <b>Residence</b>                                           |            |                         |
| Urban <sup>R</sup>                                         | 1.00       |                         |
| Rural                                                      | 1.91**     | 1.02 – 3.57             |
| <b>Education level</b>                                     |            |                         |
| None <sup>R</sup>                                          | 1.00       |                         |
| Primary                                                    | 0.86       | 0.30 – 2.42             |
| Secondary +                                                | 0.41**     | 0.16 – 1.04             |
| <b>Sex of household head</b>                               |            |                         |
| Male <sup>R</sup>                                          | 1.00       |                         |
| Female                                                     | 0.42**     | 0.25 – 0.70             |
| <b>Marital status</b>                                      |            |                         |
| Never married <sup>R</sup>                                 | 1.00       |                         |
| Married                                                    | 65.70**    | 25.50 – 169.30          |
| Ever married                                               | 55.55**    | 8.81 – 350.70           |
| <b>Occupation</b>                                          |            |                         |
| Working <sup>R</sup>                                       | 1.00       |                         |
| Not working                                                | 2.43**     | 1.43 – 4.11             |
| <b>Wealth Index</b>                                        |            |                         |
| Poor <sup>R</sup>                                          | 1.00       |                         |
| Middle                                                     | 0.57       | 0.31 – 1.00             |
| Rich                                                       | 0.47**     | 0.28 – 0.78             |
| <b>Knowledge of fertile period (ovulation cycle)</b>       |            |                         |
| Don't know <sup>R</sup>                                    | 1.00       |                         |
| Know (After periods)                                       | 2.24**     | 1.27 – 3.97             |

151 R = Reference category      \*\* significant coefficient at 5% level

152 The logistic regression analysis results indicate that older teens were twice (OR=2.00, 95% CI =1.65  
 153 – 2.43) more likely to experience teenage pregnancy than the younger teens. This finding is consistent  
 154 with the study conducted by (Kurth et al., 2010). Similarly, teens who lived in rural areas were almost  
 155 twice (OR=1.91, 95% CI=1.02 – 3.57) more likely to experience teenage pregnancy than those who  
 156 lived in urban areas. Also, teens from mountain districts had less odds. With regard to education level,  
 157 compared to teens with no education, the risk of teenage pregnancy reduced among teens with primary  
 158 education (OR=0.86, 95% CI=1.30 – 2.42), and reduced further among teens with secondary or higher  
 159 education level (OR=0.41, 95% CI=0.16 – 0.70).

160  
 161 Table 3 further shows that sex of household head was a predictor of teenage pregnancy. Teens from  
 162 households headed by a female were less likely (OR=0.42, 95% CI=0.25 – 0.70) to experience teenage  
 163 pregnancy than their counterparts from male headed households. Marital status was a statistically  
 164 significant predictor of teenage pregnancy. Married (OR = 65.70, CI= 25.50 – 169.30) or ever married  
 165 (OR=55.55, CI=8.81 – 350.70) teens and very high odds compared to the never married teens.

166 Furthermore, in comparison with working teens, those who are not working were more likely  
167 (OR=2.54, 95% CI= 1.43 – 4.11) to experience teenage pregnancy.

168  
169 Results show that the socio-economic status of a teen was a predictor of teenage pregnancy. There  
170 were reduced odds of experiencing teenage pregnancy among teens with increasing wealth index.  
171 Teens who belonged to the rich quintile were less likely (OR=0.47, 95% CI=0.28 – 0.78) to experience  
172 teenage pregnancy than their counterparts belonging to the poor category. With regard to knowledge  
173 of the ovulation cycle, compared to teens who do not know, teens who know the ovulation cycle had  
174 over twice (OR=2.24, 95% CI=1.27 – 3.97) the risk of experiencing teenage pregnancy.

## 175 176 **Discussion**

177 Teenage pregnancy in the Uganda Lake Victoria Island districts was 48.3% and 24.3% in the Mountain  
178 districts. Overall, teenage pregnancy in these special areas was 26%, which is slightly over the national  
179 figure of 24.8%. This finding is consistent with studies in other countries which show high teenage  
180 prevalence ranging from 20% to 50% (Manzi, Ogwang, Akankwatsa, Wokali, & Obba, 2018; Yakubu  
181 & Salisu, 2018) Omoro et al., 2017; Amoran, 2012; Lillian & Mumbango, 2015; Jewkes et al., 2001).  
182 This reflects a pattern of sexual activity which puts teenagers at a risk of HIV/AIDS. This could be  
183 attributed to poverty, peer pressure influence or lack of Information Education and Communication  
184 (IEC) materials to promote safe sex.

185  
186 As observed by Omoro et al (2017), this study shows that teenagers who lived in rural areas were more  
187 likely to have teenage pregnancy compared to their counterparts in the urban settings. This is because  
188 teenagers from the rural areas are less educated and have limited access to sexual health services than  
189 their urban counterparts. This is an issue of concern given that UBOS (2016) reports that 85% of  
190 Uganda's youth live in rural areas. Providers of rural health care services should make facilities youth  
191 friendly. Policies should be designed to promote youth involvement in safe sex activities.

192  
193 Results indicate that teens with primary, secondary or higher education were less likely to have teenage  
194 pregnancy compared to those with no formal education. This could be due to lack of school fees and  
195 scholastic materials, as well as lack of transport to and from school as similarly observed by Omoro  
196 et al (2017). Education plays an important role in empowering teens with information and knowledge  
197 about safe sex, as reported in other studies (Cook, 2010; Gyan, 2013; Omoro et al., 2017; Stanger-Hall  
198 & Hall, 2011; Westway, Barratt, & Seeley, 2009).

199  
200 Teens from female headed households were less likely to be exposed to teenage pregnancy compared  
201 to teens from male headed households. This could be due to lack of information communication  
202 about sexual reproductive health from the male heads of households. And as a result teens engage in  
203 early sexual activities that lead to teenage pregnancy. Girls tend to be much closer to female household  
204 heads than males household heads. Female household heads may easily discuss sexual reproductive  
205 health (SRH) issues with teenage girls than male household heads, a situation that would probably  
206 reduce the likelihood of early sexual relations and pregnancy. By contrast, the rapport between teenage  
207 girls and male household heads could be poorer and hence less discussion on SRH issues. However,  
208 Ellis et al (2003) observed that greater exposure to father absence was strongly associated with elevated  
209 risk for early sexual activity and adolescent pregnancy.

210  
211 Wealth status was a significant predictor of teenage pregnancy. Teens from rich wealth quintile had  
212 reduced odds compared to those from the poor quintile. Teens from rich households are perceived



213 to have access to desired basic childhood necessities like education and knowledge about sexual health  
214 care. However, in Nigeria, Amoran (2012) observed that students are exposed to teenage pregnancy  
215 because of low socio-economic status of the households.

216

## 217 **Conclusions**

218 Increased age, rural residence, secondary or higher education level, occupation, and socio-economic  
219 status were found to be statistically significant predisposing factors of teenage pregnancy in Uganda  
220 Lake Victoria Island shoreline area and mountain districts. We recommend that teenagers should be  
221 provided with sexual education for them to learn about the changes they go through and their sexual  
222 reproductive health rights. Other measures such as promoting household wealth creation and ensuring  
223 girls keep in school by providing them with scholastic materials and other school requirements. Also,  
224 provision of teenage-friendly health services at health facilities that include a wide range of options,  
225 as well as medically accurate counselling and information could mitigate teenage pregnancy.

226

## 227 **References**

228

229 Amoran, O. E. (2012). A comparative analysis of predictors of teenage pregnancy and its prevention

230 in a rural town in Western Nigeria. *International Journal for Equity in Health*, 11(1), 37.

231 Atuyambe, L., Mirembe, F., Tumwesigye, N. M., Annika, J., Kirumira, E. K., & Fazelid, E. (2008).

232 Adolescent and adult first time mothers' health seeking practices during pregnancy and early

233 motherhood in Wakiso district, central Uganda. *Reproductive Health*, 5(1), 13.

234 Ayanaw Habitu, Y., Yalew, A., & Azale Bisetegn, T. (2018). Prevalence and Factors Associated with

235 Teenage Pregnancy, Northeast Ethiopia, 2017: A Cross-Sectional Study. *Journal of Pregnancy*,

236 2018, 1–7. <https://doi.org/10.1155/2018/1714527>

237 Babirye, S., Akulume, M., Kisakye, A. N., & Kiwanuka, S. N. (2018). Clients and Providers'

238 Perceptions on the Quality and Provision of Contraceptive Services to Youths at

239 Community Level in Rural Uganda: A Qualitative Study. *Int J Reprod Fertil Sex Health*, 5(2),

240 118–125.

241 Cook, S. (2010). Taking account of what young women want from school sex education: Two

242 groups from Scotland and Uganda. *Journal of Health Organization and Management*, 24(5), 528–

243 533.

- 244 Donoghue, E. (1992). Sociopsychological correlates of teen-age pregnancy in the United States  
245 Virgin Islands. *International Journal of Mental Health*, 21(4), 39–49.
- 246 Ellis, B. J., Bates, J. E., Dodge, K. A., Fergusson, D. M., John Horwood, L., Pettit, G. S., &  
247 Woodward, L. (2003). Does father absence place daughters at special risk for early sexual  
248 activity and teenage pregnancy? *Child Development*, 74(3), 801–821.
- 249 Gebregzabher, T. G., Hailu, T. T., & Assefa, B. A. (2018). Determinants of teenage pregnancy in  
250 Degua Tembien District, Tigray, Northern Ethiopia: A community-based case-control study.  
251 *PloS One*, 13(7), e0200898.
- 252 Gideon, R. (2013). Factors associated with adolescent pregnancy and fertility in Uganda: analysis of  
253 the 2011 demographic and health survey data. *American Journal of Sociological Research*, 3(2), 30–  
254 35.
- 255 Gyan, C. (2013). The effects of teenage pregnancy on the educational attainment of girls at Chorkor,  
256 a suburb of Accra. *Journal of Educational and Social Research*, 3(3), 53.
- 257 Jewkes, R., Vundule, C., Maforah, F., & Jordaan, E. (2001). Relationship dynamics and teenage  
258 pregnancy in South Africa. *Social Science & Medicine*, 52(5), 733–744.
- 259 Kabagenyi, A., Habaasa, G., & Rutaremwa, G. (2016). Low Contraceptive Use among Young  
260 Females in Uganda: Does Birth History and Age at Birth have an Influence? Analysis of  
261 2011 Demographic and Health Survey. *Journal of Contraceptive Studies*, 1(1). Retrieved from  
262 <https://www.ncbi.nlm.nih.gov/pmc/articles/PMC5354263/>
- 263 Kaye, D. K. (2008). Negotiating the transition from adolescence to motherhood: Coping with  
264 prenatal and parenting stress in teenage mothers in Mulago hospital, Uganda. *BMC Public*  
265 *Health*, 8(1), 83.

- 266 Kurth, F., B elard, S., Mombo-Ngoma, G., Schuster, K., Adegnika, A. A., Bouyou-Akotet, M. K., ...  
267 Ramharter, M. (2010). Adolescence as risk factor for adverse pregnancy outcome in Central  
268 Africa—a cross-sectional study. *PloS One*, 5(12), e14367.
- 269 Lillian, P., & Mumbango, T. (2015). Statistical Modelling of Adolescent Pregnancy in Namibia.  
270 *Journal of Nursing Care*, 4(262), 2167–1168.
- 271 Lwihula, G. K., Outwater, A., & Nyamuryekung’e, K. (2006). Sexually transmitted diseases in  
272 Mwanza, Tanzania: risk, beliefs, health care seeking behaviour, and responses. *East African*  
273 *Journal of Public Health*, 3(1), 1–7.
- 274 Manzi, F., Ogwang, J., Akankwatsa, A., Wokali, O. C., & Obba, F. (2018). Factors Associated with  
275 Teenage Pregnancy and its Effects in Kibuku Town Council, Kibuku District, Eastern  
276 Uganda: A Cross Sectional Study. *Prim Health Care*, 8(298), 2167–1079.
- 277 Mollborn, S. (2010). Predictors and consequences of adolescents’ norms against teenage pregnancy.  
278 *The Sociological Quarterly*, 51(2), 303–328.
- 279 Murphy-Erby, Y., Stauss, K., & Estupinian, E. F. (2013). A participant-informed model for  
280 preventing teen pregnancy in a rural Latino community. *Journal of Family Social Work*, 16(1),  
281 70–85.
- 282 Omoro, T., Gray, S. C., Otieno, G., Mbede, C., Phillips-Howard, P. A., Hayes, T., ... Gust, D. A.  
283 (2017). Teen pregnancy in rural western Kenya: a public health issue. *International Journal of*  
284 *Adolescence and Youth*, 1–10. <https://doi.org/10.1080/02673843.2017.1402794>
- 285 Stanger-Hall, K. F., & Hall, D. W. (2011). Abstinence-only education and teen pregnancy rates: why  
286 we need comprehensive sex education in the US. *PloS One*, 6(10), e24658.
- 287 UBOS. (2011). *Uganda Demographic and Health Survey (UDHS) 2011*. Uganda Bureau of Statistics Kampala,  
288 Uganda.

- 289 UBOS. (2016). *Uganda Demographic and Health Survey (UDHS) 2016*. Uganda Bureau of Statistics Kampala,  
290 Uganda.
- 291 UNICEF. (2015). *THE NATIONAL STRATEGY TO END CHILD MARRIAGE AND*  
292 *TEENAGE PREGNANCY 2014/2015 – 2019/2020. A society free from child marriage and*  
293 *teenage pregnancy*.
- 294 Westway, E., Barratt, C., & Seeley, J. (2009). Educational attainment and literacy in ugandan fishing  
295 communities: Access for All? *Maritime Studies*, 8(2), 73–97.
- 296 WHO. (2014). Adolescent pregnancy fact sheet. Retrieved from. Retrieved from  
297 <http://www.who.int/mediacentre/factsheets/fs364/en/>
- 298 Yakubu, I., & Salisu, W. J. (2018). Determinants of adolescent pregnancy in sub-Saharan Africa: a  
299 systematic review. *Reproductive Health*, 15(1). <https://doi.org/10.1186/s12978-018-0460-4>  
300
